# Supplementary material for: Hybridizing aggregated gold nanoparticles with a hydrogel to prepare a flexible SERS chip for detecting organophosphorus pesticides
Source: Royal Society of Chemistry journal article supplement (doi:10.1039/d2an00541g), 2022-01-01
Supplement: d2an00541g1.pdf [file d2an00541g1.pdf]

# Hybridizing Aggregated Gold Nanoparticles with Hydrogel to Prepare Flexible SERS Chip for Detecting Organophosphorus Pesticides

Jiaxin Zhang,<sup>a</sup> Xiajun Zhu,<sup>a</sup> Mingming Chen,<sup>a</sup> Tianwen Chen,<sup>\*b</sup> Zhihong Liu,<sup>a</sup> Jianli Huang,<sup>c</sup> Fengfu Fu,<sup>a</sup> Zhenyu Lin,<sup>a</sup> and Yongqiang Dong<sup>\*a</sup>

<sup>a</sup>MOE Key Laboratory for Analytical Science of Food Safety and Biology, Fujian Provincial Key Laboratory of Analysis and Detection Technology for Food Safety, College of Chemistry, Fuzhou University, Fuzhou, China. E-mail: dongyq@fzu.edu.cn

<sup>b</sup>Fujian College Association Instrumental Analysis Center of Fuzhou University, Fuzhou, China. E-mail: ctianwen@fzu.edu.cn

<sup>c</sup>Institute of Grain and Oil Quality Supervision and Test of Fujian, Fuzhou, 350012, China.

**Materials and Reagents.**  $\text{HAuCl}_4 \cdot 3\text{H}_2\text{O}$  (99%) was purchased from Macklin Biochemical Co., Ltd (Shanghai, China). Sodium citrate (99%), PVA 1799 and 4-Aminothiophenol (4-ATP, 97%) were purchased from Aladdin Biochemical Co., Ltd (Shanghai, China). Triazophos and phosmet (100  $\mu\text{g/mL}$ , acetone as solvent) were from China CNAS Standard Material Center. Deionized (DI) water was used in all experiments. All other chemicals were of analytical grade and used without further treatment.

**Characterizations.** The morphology and average sizes of AuNPs were characterized by a transmission electron microscope (FEI Talos F200S G2). The dynamic scattered light (DLS) analysis of the AuNPs and a-AuNPs was investigated using a Zetasizer Nano ZS90 DLS system equipped with a 633 nm laser (Malvern Instruments Ltd., England). UV-vis spectra were measured by a UV-vis spectrophotometer (TU-1950,

Beijing Purkay General Instrument Co. Ltd.). The SERS measurements of 4-ATP, triazophos and phosmet were carried out by a Renishaw InVia Reflex Raman spectrometer at room temperature with a 632.8 nm He-Ne laser source (laser power: ~13.1 mW, laser spot: 1.25  $\mu\text{m}^2$ ). The objective lens of the microscope was 50 $\times$  magnification, with a numerical aperture of 0.5. The grating was 1800 lines/mm, and the exposure time was 10 s.

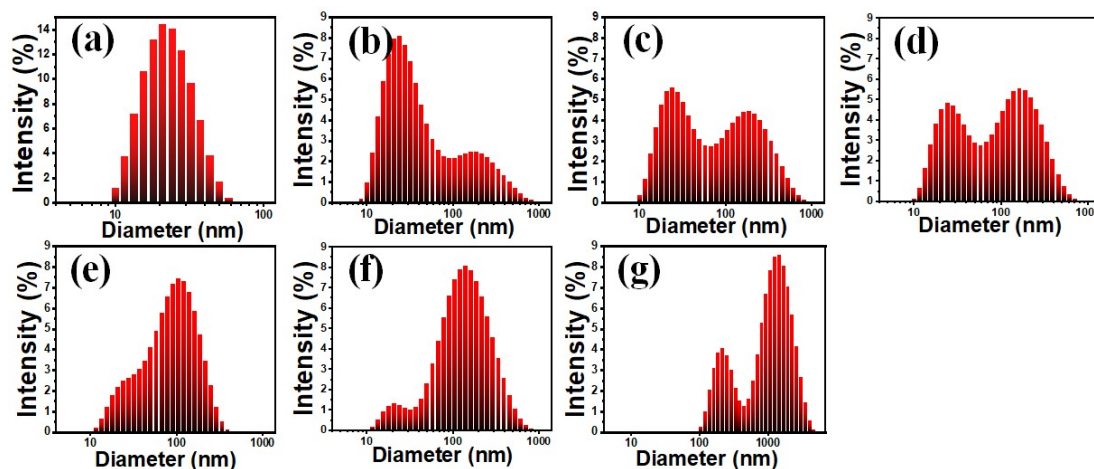

**Figure S1.** DLS analysis of AuNPs and a-AuNPs induced by different amounts of  $\text{Ca}^{2+}$ .

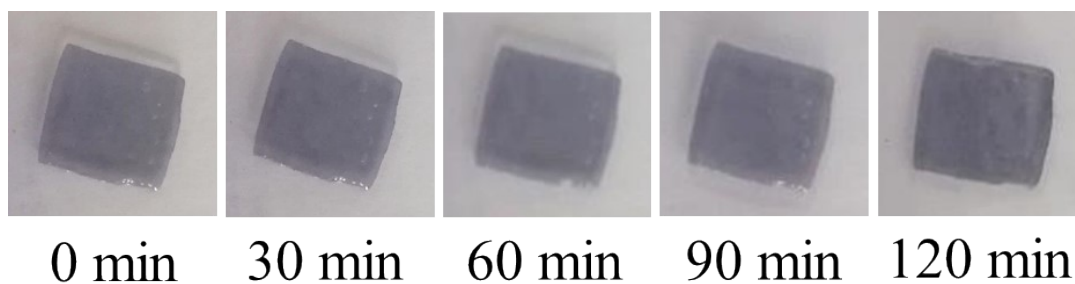

**Figure S2.** Photographs of the hydrogel chip after being soaked in 4-ATP solution for different time.

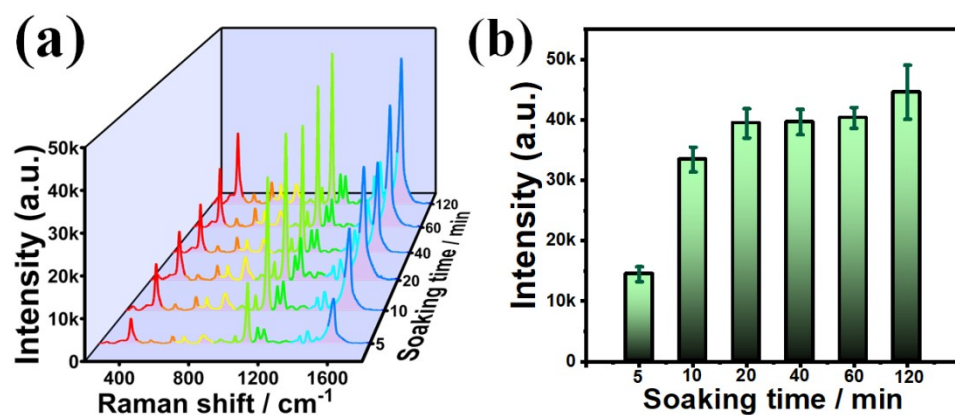

**Figure S3.** (a) SERS spectra of 4-ATP with different soaking time, (b) effect of soaking time on the peak intensity of 4-ATP at 1079  $\text{cm}^{-1}$ . The concentration of 4-ATP in the solution is  $1 \times 10^{-6}$  mol/L.

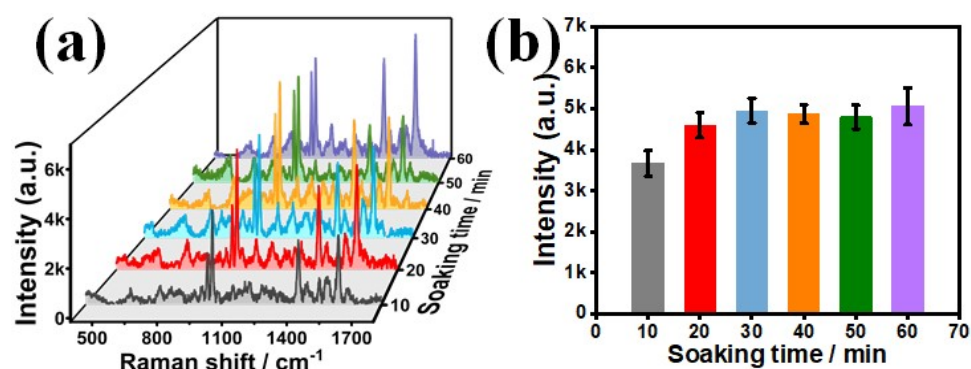

**Figure S4.** (a) SERS spectra of triazophos with different soaking time, (b) effect of soaking time on the peak intensity of triazophos at 1001  $\text{cm}^{-1}$ . The concentration of 1001  $\text{cm}^{-1}$  in the solution is  $1 \times 10^{-6}$  mol/L.

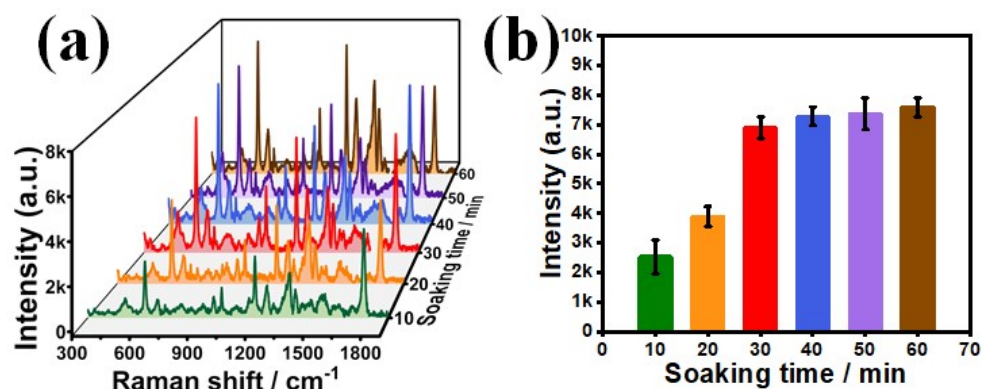

**Figure S5.** (a) SERS spectra of phosmet with different soaking time, (b) effect of soaking time on the peak intensity of phosmet at 1001 cm<sup>-1</sup>. The concentration of 1001 cm<sup>-1</sup> in the solution is 1×10<sup>-6</sup> mol/L.

**Table S1.** Comparison of different SERS substrates to detection of 4-ATP

| Substrate                                    | LOD                         | References |
|----------------------------------------------|-----------------------------|------------|
| AuNPAs-TNT-AgNPs sandwich structure          | 4.4×10 <sup>-12</sup> mol/L | 1          |
| MXene/AuNRs                                  | 10 <sup>-9</sup> mol/L      | 2          |
| PET/pDA/ZnO/Ag                               | 10 <sup>-9</sup> mol/L      | 3          |
| IP6@AuNPs@Fe <sup>3+</sup>                   | 10 <sup>-7</sup> mol/L      | 4          |
| Ag@AuNWs                                     | 10 <sup>-9</sup> mol/L      | 5          |
| sea urchin-like AuNPs                        | 10 <sup>-12</sup> mol/L     | 6          |
| HOH AuNPs                                    | 10 <sup>-10</sup> mol/L     | 7          |
| Au@SiO <sub>2</sub> @Ag@SiO <sub>2</sub> NPs | 10 <sup>-16</sup> mol/L     | 8          |
| GO-P4VP/Au composites                        | 10 <sup>-8</sup> mol/L      | 9          |
| Fe <sub>3</sub> O <sub>4</sub> @AuNPs        | 10 nmol/L                   | 10         |
| Au/DW                                        | 10 <sup>-9</sup> mol/L      | 11         |
| sponge-like Au–Ag alloy NCs                  | 10 <sup>-10</sup> mol/L     | 12         |

---

|                                                      |                         |    |
|------------------------------------------------------|-------------------------|----|
| P(AAm-co-AA) hydrogel<br>microsphere @ Au            | 10 <sup>-12</sup> mol/L | 13 |
| nanospheres                                          |                         |    |
| SiO <sub>2</sub> nanopillar arrays/Au<br>film/ AgNPs | 10 <sup>-8</sup> mol/L  | 14 |

---

#### References:

1. W. Gao, T. Wang, C. Zhu, P. Sha, P. Dong, X. Wu, *Talanta* **2022**, 236, 122824.
2. T. Wang, P. Dong, C. Zhu, W. Gao, P. Sha, Y. Wu, X. Wu, *Ceram. Int.* **2021**, 47, 30082-30090.
3. D. Cheng, Y. Zhang, C. Yan, Z. Deng, X. Tang, G. Cai, X. Wang, *J. Mol. Liq.* **2021**, 116639.
4. L. Zhang, Y.-j. Weng, X. Liu, W. Gu, X. Zhang, L. Han, *Sci. Rep.* **2020**, 10, 1-9.
5. Y. Qin, Y. Wu, B. Wang, J. Wang, W. Yao, *J. Alloys Compd.* **2021**, 884, 161053.
6. Y. Qin, Y. Wu, B. Wang, J. Wang, X. Zong, W. Yao, *RSC Adv.* **2021**, 11, 19813-19818.
7. C. Bi, Y. Song, H. Zhao, G. Liu, *ACS Appl. Nano Mater.* **2021**, 4, 4584-4592.
8. B. Lu, Q. Qi, Y. Wang, H. Chang, J. Zhai, T. You, *RSC Adv.* **2020**, 10, 3826-3831.
9. L. Feng, K. Wang, P. Li, W. Wang, T. Chen, *New J. Chem.* **2018**, 42, 17016-17020.
10. W.-E. Hong, I.-L. Hsu, S.-Y. Huang, C.-W. Lee, H. Ko, P.-J. Tsai, D.-B. Shieh, C.-C. Huang, *J. Mater. Chem. B* **2018**, 6, 5689-5697.
11. M. Wang, G. Shi, Y. Zhu, Y. Wang, W. Ma, *Nanomaterials* **2018**, 8, 289.
12. T. Zhang,; F. Zhou, L. Hang, Y. Sun, D. Liu, H. Li, G. Liu, X. Lyu, C. Li, W. Cai, *J. Mater. Chem. C* **2017**, 5, 11039-11045.
13. H. Li, D. Men, Y. Sun, D. Liu, X. Li, L. Li, C. Li, W. Cai, Y. Li, *J. Colloid Interface Sci.* **2017**, 505, 467-475.
14. D. Men, Y. Wu, C. Wang, J. Xiang, G. Yang, C. Wan, H. Zhang, *Materials* **2018**, 11, 239.
